# Supplementary material for: Minimally destructive and multi-element analysis of aluminium alloys by ArF laser-induced atomic emissions
Source: Royal Society of Chemistry journal article supplement (doi:10.1039/b611899b), 2006-12-14
Supplement: suppinfo.doc [file suppinfo.doc]

This journal © The Royal Society of Chemistry 2006

Minimally destructive and Multi-element Analysis of Aluminium Alloys by ArF Laser-induced Atomic Emissions

S.K. Ho and N.H. Cheung

**SUPPLEMENTARY INFORMATION**

**Fig. S1.** The original spectra that were stitched to form Fig. 2 of the manuscript. The various lines were: Pb 283.3 and 287.3 nm, Mg 285.2 nm, Si 288.2 nm, Bi 289.8 nm, Cu 324.7 and 327.4 nm, and Na 589.0 and 589.6 nm. The rest were Al II lines. We did not show the Al II, Pb, and Bi lines in Fig. 2 because we did not intend to measure the calibration curves of those lines.
